# 1 ON THE UNCERTAINTY ABOUT HERD IMMUNITY 2 LEVELS REQUIRED TO STOP COVID-19 EPIDEMICS

3 Daniel Gianola<sup>a,b,c</sup>

<sup>a</sup> Department of Animal Sciences, University of Wisconsin-Madison, USA;

<sup>b</sup> Department of Dairy Science, University of Wisconsin-Madison, USA;

<sup>c</sup> Institut Pasteur de Montevideo, URUGUAY

<sup>1</sup>Corresponding author. Email: [gianola@ansci.wisc.edu](mailto:gianola@ansci.wisc.edu)

4 May 31, 2020

## 5 Abstract

6 COVID-19 evolved into a pandemic in 2020 affecting more than 150 countries. Given  
7 the absence of a vaccine, discussion has taken place on the strategy of allowing the  
8 virus to spread in a population, to increase population "herd immunity". Knowledge  
9 of the minimum proportion of a population required to have recovered from COVID-  
10 19 infection in order to attain "herd" immunity,  $P_{crit}$ , is important for formulating  
11 epidemiological policy. A method for measuring uncertainty about  $P_{crit}$  based on a  
12 widely used package, EpiEstim, is derived. The procedure is illustrated using data  
13 from twelve countries at two early times during the COVID-19 epidemic. It is shown  
14 that simple plug-in measures of confidence on estimates of  $P_{crit}$  are misleading, but that  
15 a full characterization of statistical uncertainty can be derived from EpiEstim, which  
16 reports percentiles only. Because of the important levels of uncertainty, it is risky to  
17 design epidemiological policy based on guidance provided by a single point estimate.

## 18 1 Introduction

19 COVID-19 evolved into a pandemic in 2020 affecting more than 150 countries that vary in size,  
20 population density, economic resources and public health systems. Given the absence of a vaccine,  
21 considerable discussion (e.g., Dowdy and D'Souza, 2020) at various society levels has taken place on

22 a strategy of allowing the virus to spread in a population, to increase population "herd immunity".  
23 Sweden's adoption of the approach has been at the center of the debate.

24 Kwok et al. (2020) estimated the minimum proportion of a population required to have re-  
25 covered from COVID-19 infection in order to attain "herd" immunity,  $P_{crit}$  in various countries.  
26 Knowing  $P_{crit}$  is important for formulating epidemiological policies tailored to a specific country.  
27 The parameter  $P_{crit}$  is inferred from an estimate of  $R_t$ , the viral reproductive, defined as the num-  
28 ber of infections per infector at a given time of the epidemic at time  $t$ . The formula relating these  
29 two quantities is  $P_{crit} = 1 - R_t^{-1}$  (Anderson and May, 1992). Since  $P_{crit}$  is a fraction, it must take  
30 values between 0 and 1, implying that  $R_t$  must be larger than 1 for the expression to be meaning-  
31 ful. As  $R_t$  increases beyond 1, so does the minimum fraction of the population that needs to be  
32 infected. Since  $R_t$  must be estimated soon after the epidemic starts, often there is large statistical  
33 uncertainty associated with the estimate, especially in countries where there are a few cases at the  
34 onset. Because the uncertainty about  $R_t$  propagates into  $P_{crit}$  it is important to consider it.

35 The objective here is to show how to measure uncertainty about  $P_{crit}$ . The procedure is  
36 illustrated using data from twelve countries at two early times during the COVID-19 epidemic.

## 37 **2 Inference of $P_{crit}$**

38  $R_t$  is estimated from a time series containing the number of infections  $I_0, I_1, \dots, I_t$  ( $t$  denotes time)  
39 and from information on the statistical distribution of the virus serial interval, defined as the  
40 number of days mediating between the appearance of symptoms in pairs of infectors and infected  
41 persons. Nishiura et al. (2020) used data on 28 pairs of patients in the context of SARS-CoV-2  
42 infections and found that a log-normal distribution with mean and standard deviation of 4.7 and  
43 2.9 days, respectively, provided the best fit.

44 Table 1 of Kwok et al. (2020) displays estimates of  $R_t$  and of  $P_{crit}$  obtained at early stages of  
45 the COVID-19 epidemic for various countries. It does not report statistical uncertainty associated  
46 with the latter, although confidence intervals are provided for  $R_t$ . The confidence intervals can be  
47 wide, especially for countries with smaller number of cases in the time series. For example, in the  
48 table, the width of the 95% confidence interval on  $R_t$  for the USA is 0.28 whereas for Slovenia it  
49 is 3.47. A rough confidence interval for  $P_{crit}$  can be constructed by a plug-in method using values  
50 of the bands for  $R_t$ , but this way of proceeding may be misleading.

51 A suitable measure of the statistical uncertainty associated with inferring  $P_{crit}$  is obtained using  
52 a Bayesian approach such as the one employed in the R package **EpiEstim** described in Cori et  
53 al. (2013), but with some minor external (to the program) modifications. Briefly, the package  
54 employs a model that assumes that the number of infections observed at time  $t$  follows a Poisson  
55 distribution with parameter  $R_t \Lambda_t$ . Here,  $\Lambda_t$  is a weighted average of past infections; weights are  
56 calculated from knowledge (or estimation) of the serial interval distribution. If,  $R_t$  is assigned a

57  $\text{Gamma}(a, b)$  prior distribution, the posterior is also a  $\text{Gamma}(a_t, b_t)$  distribution where  $a_t$  and  $b_t$   
 58 depend on  $a$  and  $b$ , on the number of past infections and on the distribution of the serial interval  
 59 (Cori et al., 2013) .

60 Since  $R_t$  has a  $\text{Gamma}(a_t, b_t)$  posterior distribution, then  $R_t^{-1}$  has an inverse Gamma distrib-  
 61 ution with parameters  $(a_t, b_t)$  (Sorensen and Gianola, 2002; Gelman et al., 2014) with density

$$62 \quad f(R_t^{-1} | I_0, I_1, \dots, I_t, \text{serial interval distribution}) \propto (R_t^{-1})^{-a_t-1} \exp\left(-\frac{b_t}{R_t^{-1}}\right). \quad (1)$$

63 Since  $R_t^{-1} = 1 - P_{crit}$  is a linear relationship, the posterior distribution of  $P_{crit}$  has density

$$64 \quad \begin{aligned} & f(P_{crit} | I_0, I_1, \dots, I_t, \text{serial interval distribution}) \\ 65 \quad &= \frac{(1 - P_{crit})^{-a_t-1} \exp\left(-\frac{b_t}{1 - P_{crit}}\right)}{\int_0^1 (1 - P_{crit})^{-a_t-1} \exp\left(-\frac{b_t}{1 - P_{crit}}\right) dP_{crit}}; 0 < P_{crit} < 1. \end{aligned} \quad (2)$$

66 For instance, if  $a_t = 164$  and  $b_t = 65$ , the posterior density of  $P_{crit}$  is

$$67 \quad f(P_{crit} | I_0, I_1, \dots, I_t, \text{serial interval distribution}) = \frac{(1 - P_{crit})^{-(164+1)} \exp\left(-\frac{65}{1 - P_{crit}}\right)}{9.6426 \times 10^{-7}}, \quad (3)$$

68 and takes the form depicted in Figure 1. The posterior expectation of  $R_t$  is  $\frac{164}{65} \approx 2.52$  so a plug-in  
 69 estimate would give  $1 - \frac{1}{2.52} \approx 0.60$  as an approximation to the posterior mean of  $P_{crit}$ , implying  
 70 that a minimum 60% of the population needs to be infected in order to attain herd immunity. The  
 71 posterior mean and standard deviation of  $P_{crit}$  are 0.60 and 0.03, respectively, and the coefficient of  
 72 variation is 5.2%. The posterior probability that  $P_{crit}$  is larger than 0.60 is 53.6%.; the probability  
 73 that it is smaller than 0.55 is 5.9%, and the probability that it takes values between 0.55 and  
 74 0.60 is about 40.5%. Assuming the case fatality rate is 1%, in a country with a population of  
 75 10 million persons (e.g., Azerbaijan or Sweden), the "road" to immunity would produce about  
 76 55,000 expected deaths if  $P_{crit} = 0.55$ , versus 62,000 if it were  $P_{crit} = 0.62$ , a difference of 7,000  
 77 person dying. The larger the uncertainty about  $P_{crit}$ , the larger the risk associated with choosing  
 78 a strategy for control of the epidemic.

### 79 **3 Application to the COVID-19 pandemic**

80 Data were downloaded from the European Centre for Disease Prevention and Control, an European  
 81 Union organization based in Sweden. Twelve countries were chosen and organized into two groups

82 as shown in Table 1. Estimates of  $R_t$  (posterior median and 2.5 and 97.5 percentiles of the posterior  
83 distribution) were obtained using **EpiEstim** at times  $t = 8, 14$  from the first case. Simple "plug-in"  
84 estimates of  $P_{crit}$  and of percentiles were derived from the relationship between the latter and  $R_t$ .  
85 In some cases (Brasil, Uruguay, New Zealand and USA) some percentiles could not be calculated  
86 because  $R_t$  was smaller than 1, producing "plug-in" estimates of  $P_{crit}$  outside of its parameter  
87 space. Inter-percentile ranges were wide in many instances. For example, at  $t = 8$  (the earliest  
88 time at which **EpiEstim** produced an estimate of  $R_t$ , the range was 35% in Argentina, 31% in  
89 Cuba, 37% in Denmark and 22% in Israel; at  $t = 14$  the range was still wide for Israel, at 35%.  
90 For Sweden, the ranges were 21% and 8% at times  $t = 8$  and  $t = 14$ , respectively. The uncertainty  
91 about  $P_{crit}$  was large for many countries.

92 Instead of using the crude "plug-in" method, which can yield estimates outside of the  $0 - 1$   
93 space for a proportion, **EpiEstim** can be "tricked" to produce the entire posterior distribution.  
94 At any  $t$ , **EpiEstim** returns the mean and standard deviation ( $sd$ ) of the posterior distribution.  
95 If the parameterization is  $Gamma(shape = a, rate = b)$ , then  $a = \left(\frac{mean}{sd}\right)^2$  and  $b = \frac{mean}{sd^2}$  from  
96 which (2) can be numerically evaluated. Alternatively, the posterior distribution of  $P_{crit}$  can be  
97 estimated by drawing random numbers from a computer as follows: 1) sample a large number of  
98  $Gamma(a, b)$  deviates. 2) For each draw, form  $1 - \frac{1}{sampled\ value}$ , and accept it as draw from  
99 the posterior distribution of  $P_{crit}$  if it resides in the  $(0, 1)$  interval; discard it otherwise.

100 The posterior densities for Group A and B countries are in Figures 2 and 3, respectively. The  
101 "plug-in" measures of uncertainty for  $P_{crit}$  derived from the percentiles of the posterior distribution  
102 of  $R_t$  were often misleading or useless. For example, for Argentina (Figure 2, curve in red) the  
103 naive lower bounds for  $t = 8$  does not inform that  $P_{crit}$  should probably be at least 50% to attain  
104 herd immunity. For Israel (Figure 3) the naive bounds exaggerate uncertainty as the posterior  
105 densities are reasonably sharp, both at  $t = 8$  and  $t = 14$ . In Uruguay (Figure 2), the low number  
106 of cases observed translated into low values of  $R_t$ , especially at  $t = 14$  but suggested that herd  
107 immunity could be reached with a low proportion of the population infected, which would perhaps  
108 take a considerable amount of time but at a low cost in terms of number of dead people. However,  
109 at  $t = 8$  the analysis suggested that  $P_{crit}$  would need to be around 50 – 60%. For Sweden (Figure  
110 3), it appears that  $P_{crit}$  would need to be at least 55%; for the USA (Figure 3), the uncertainty  
111 was enormous, as suggested by the analyses conducted at  $t = 8$  and  $t = 14$ .

## 112 4 Conclusion

113 Attaining herd immunity requires a minimum proportion of the population to be infected. Such  
114 proportion can be inferred from estimates of the virus reproducing number calculated at early  
115 stage of the epidemic. Plug-in measures of confidence on estimates were misleading, but a full  
116 characterization of statistical uncertainty was derived from publicly available software. Because of

117 the important levels of uncertainty, it is extremely risky to design epidemiological policy based on  
118 the guidance provided by a single point estimate, as in Kwok et al. (2020).

## 119 5 References

120 Cori A, Ferguson NM, Fraser C, Cauchemez S. A new framework and software to estimate time-  
121 varying reproduction numbers during epidemics. *American Journal of Epidemiology* 2013 178:  
122 1505-1512.

123 Dowdy D, D'Souza G. Early Herd Immunity against COVID-19: a dangerous misconcep-  
124 tion. 2020. Department of Epidemiology, Johns Hopkins Bloomberg School of Public Health  
125 <https://coronavirus.jhu.edu/from-our-experts/early-herd-immunity-against-covid-19-a-dangerous-misconception>

126 Gelman A, Carlin JB, Stern HS, Dunson DB, Vehtari A, Rubin DB. *Bayesian Data Analysis*  
127 (3rd Ed) 2014. CRC Press, Boca Raton.

128 Kwok Ko, Lai F, Wei WI, Wong SYS, Tang JWT. Herd immunity- estimating the level required  
129 to halt the COVI-19 epidemics in affected countries. *J Infect* 2020 doi.org/10.1016/j.inf.2020.03.027

130 Nishiura H, Linton NM, Akhmetzhanov AR. Serial interval of novel coronavirus (COVID-19)  
131 infections. *International Journal of Infectious Diseases* 2020 93 284-286.

132 Sorensen D, Gianola D. *Likelihood, Bayesian and MCMC methods in quantitative genetics* 2002.  
133 Springer, New York.

Table 1. Estimates of the median, 2.5 and 97.5 percentiles of the posterior distribution of  $R_{[t]}$  (virus reproducing number) at days  $t=8, 14$  of the COVID-19 pandemic in twelve countries. The “plug-in”  $P_{crit}$  (minimum proportion of the population that needs to be infected in order to reach herd immunity) estimates are directly obtained from the relationship  $P_{crit} = 1 - R_{[t]}^{-1}$ .

|                   | <b>Median <math>R_{[8]}</math></b><br><b>(2.5%<sub>[8]</sub>, 97.5%<sub>[8]</sub>)</b> | <b><math>P_{crit[8]}</math></b><br><b>(2.5%<sub>[8]</sub>, 97.5%<sub>[8]</sub>)</b> | <b>Median <math>R_{[14]}</math></b><br><b>(2.5%<sub>[14]</sub>, 97.5%<sub>[14]</sub>)</b> | <b><math>P_{crit[14]}</math></b><br><b>(2.5%<sub>[14]</sub>, 97.5%<sub>[14]</sub>)</b> |
|-------------------|----------------------------------------------------------------------------------------|-------------------------------------------------------------------------------------|-------------------------------------------------------------------------------------------|----------------------------------------------------------------------------------------|
| <b>GROUP A</b>    |                                                                                        |                                                                                     |                                                                                           |                                                                                        |
| <i>Argentina</i>  | 3.31 (2.31,4.56)                                                                       | 0.70 (0.43,0.78)                                                                    | 2.11 (1.72,2.56)                                                                          | 0.53 (0.42,0.61)                                                                       |
| <i>Brasil</i>     | 1.14 (0.16,3.79)                                                                       | 0.12 ( <i>ND</i> <sup>1</sup> ,0.74)                                                | 3.18 {2.06,4.63}                                                                          | 0.69 (0.54,0.78)                                                                       |
| <i>Chile</i>      | 3.27 (2.11,4.81)                                                                       | 0.69 (0.53,0.79)                                                                    | 4.18 (3.61,4.82)                                                                          | 0.76 (0.72,0.79)                                                                       |
| <i>Cuba</i>       | 2.70 (1.74,3.96)                                                                       | 0.63 (0.43,0.74)                                                                    | 1.81 (1.39,2.31)                                                                          | 0.45 (0.28,0.57)                                                                       |
| <i>Peru</i>       | 3.31 (2.41,4.40)                                                                       | 0.70 (0.58,0.77)                                                                    | 2.73 (2.39,3.10)                                                                          | 0.63 (0.58,0.68)                                                                       |
| <i>Uruguay</i>    | 2.58 (2.16,3.05)                                                                       | 0.61 (0.54,0.67)                                                                    | 1.03 (0.86,1.22)                                                                          | 0.03 ( <i>ND</i> <sup>1</sup> ,0.18)                                                   |
| <b>GROUP B</b>    |                                                                                        |                                                                                     |                                                                                           |                                                                                        |
| <i>Denmark</i>    | 3.07 (1.52,3.43)                                                                       | 0.67 (0.34,0.71)                                                                    | 10.30 (9.09,11.61)                                                                        | 0.90 (0.89,0.91)                                                                       |
| <i>Germany</i>    | 3.13 (2.96,3.61)                                                                       | 0.68 (0.66,0.72)                                                                    | 2.39 (2.25,2.55)                                                                          | 0.58 (0.56,0.61)                                                                       |
| <i>Israel</i>     | 3.69 (1.56,7.24)                                                                       | 0.73 (0.36,0.86)                                                                    | 2.46 (1.59,3.62)                                                                          | 0.59 (0.37,0.72)                                                                       |
| <i>N. Zealand</i> | 2.65 (0.92,5.81)                                                                       | 0.62 ( <i>ND</i> <sup>1</sup> ,0.83)                                                | 3.83 (2.86,5.00)                                                                          | 0.74 (0.65,0.80)                                                                       |
| <i>Sweden</i>     | 3.30 (2.31,4.54)                                                                       | 0.70 (0.57,0.78)                                                                    | 2.84 (2.53,3.17)                                                                          | 0.65 (0.60,0.68)                                                                       |
| <i>USA</i>        | 2.85 (0.99,6.24)                                                                       | 0.65 ( <i>ND</i> <sup>1</sup> ,0.84)                                                | 1.53 (0.65,3.00)                                                                          | 0.35 ( <i>ND</i> <sup>1</sup> ,0.67)                                                   |

<sup>1</sup>*ND*: not defined because  $R < 1$ .

Figure 1. Posterior density of  $P(\text{crit})$  for a hypothetical example.  $E[P(\text{crit})]=0.60$  and the posterior coefficient of variation is 5.2%.

Figure 2. Posterior densities of  $P(\text{crit})$  at times=8 and 14 of the COVID19 pandemic for Argentina, Brasil, Chile, Cuba, Peru and Uruguay

Figure 3. Posterior densities of  $P(\text{crit})$  at times=8 and 14 of the COVID19 pandemic for Denmark, Germany, Israel, New Zealand, Sweden and USA

Density

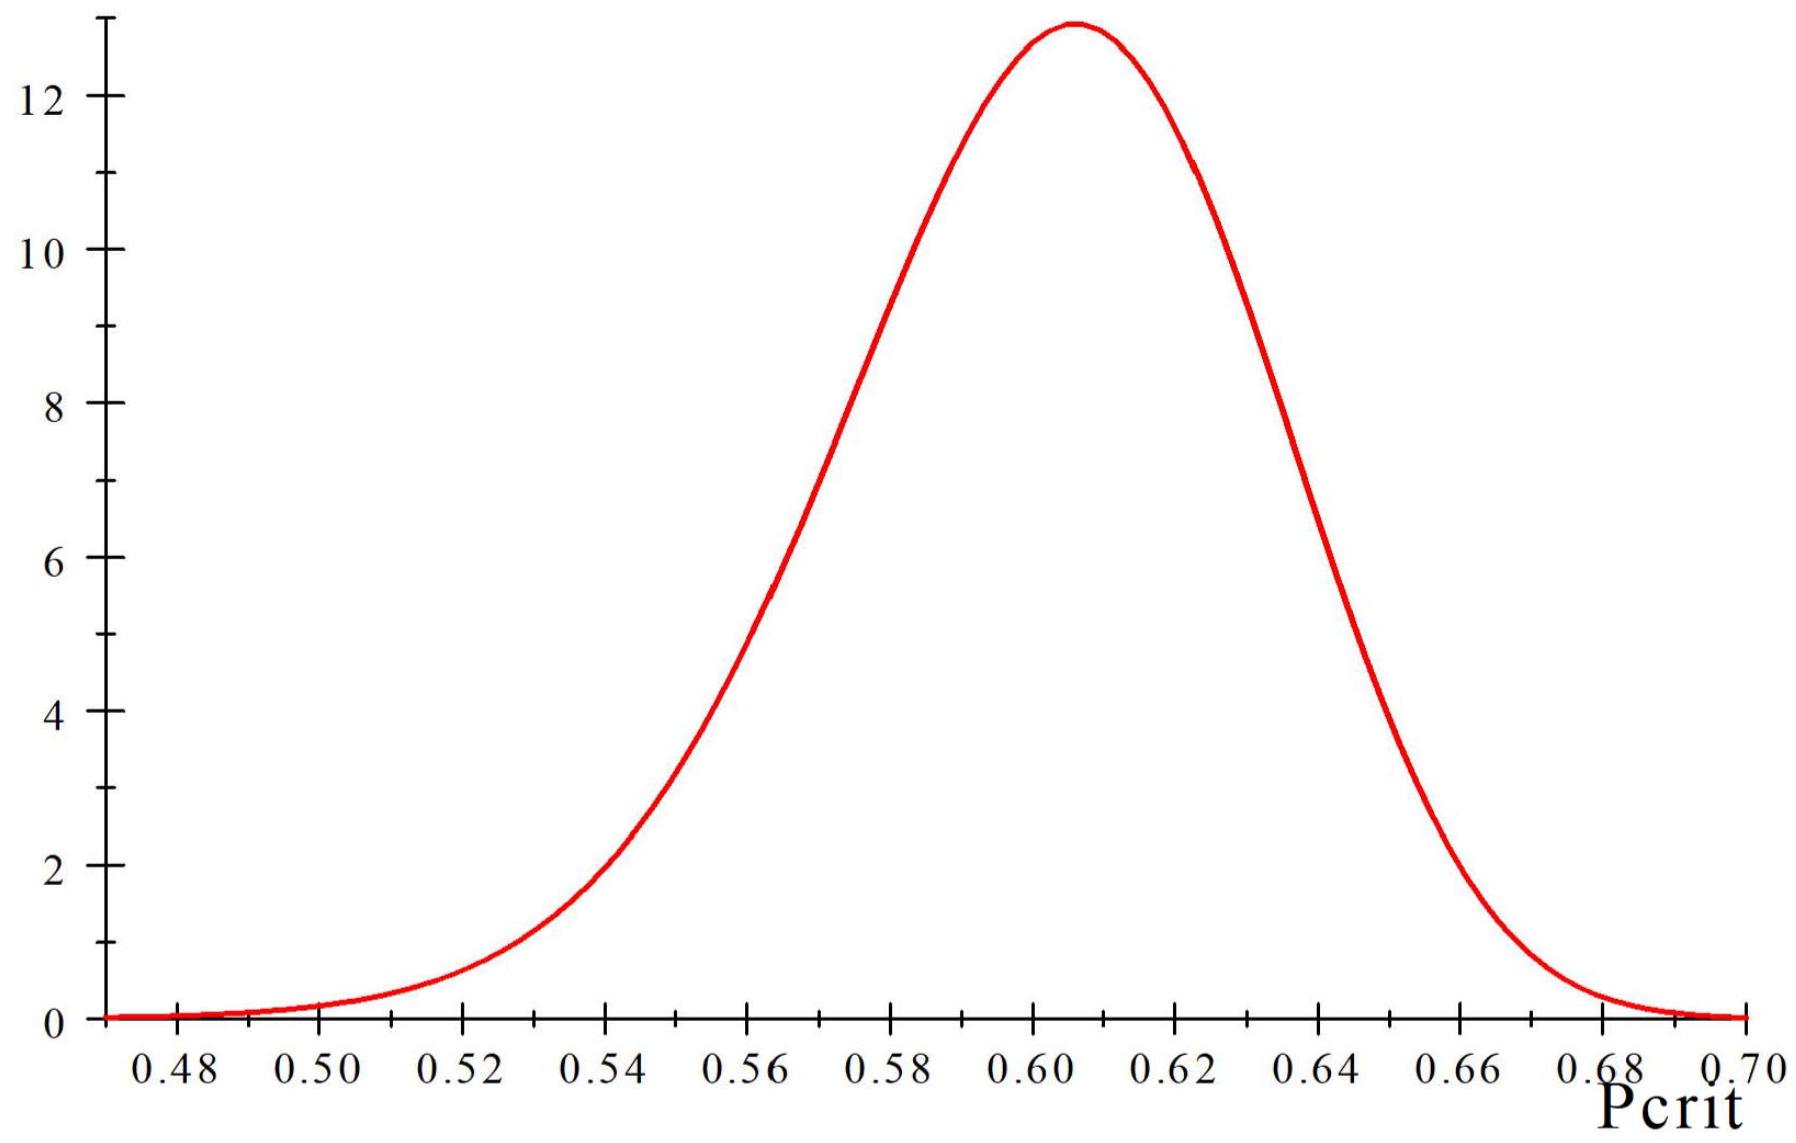



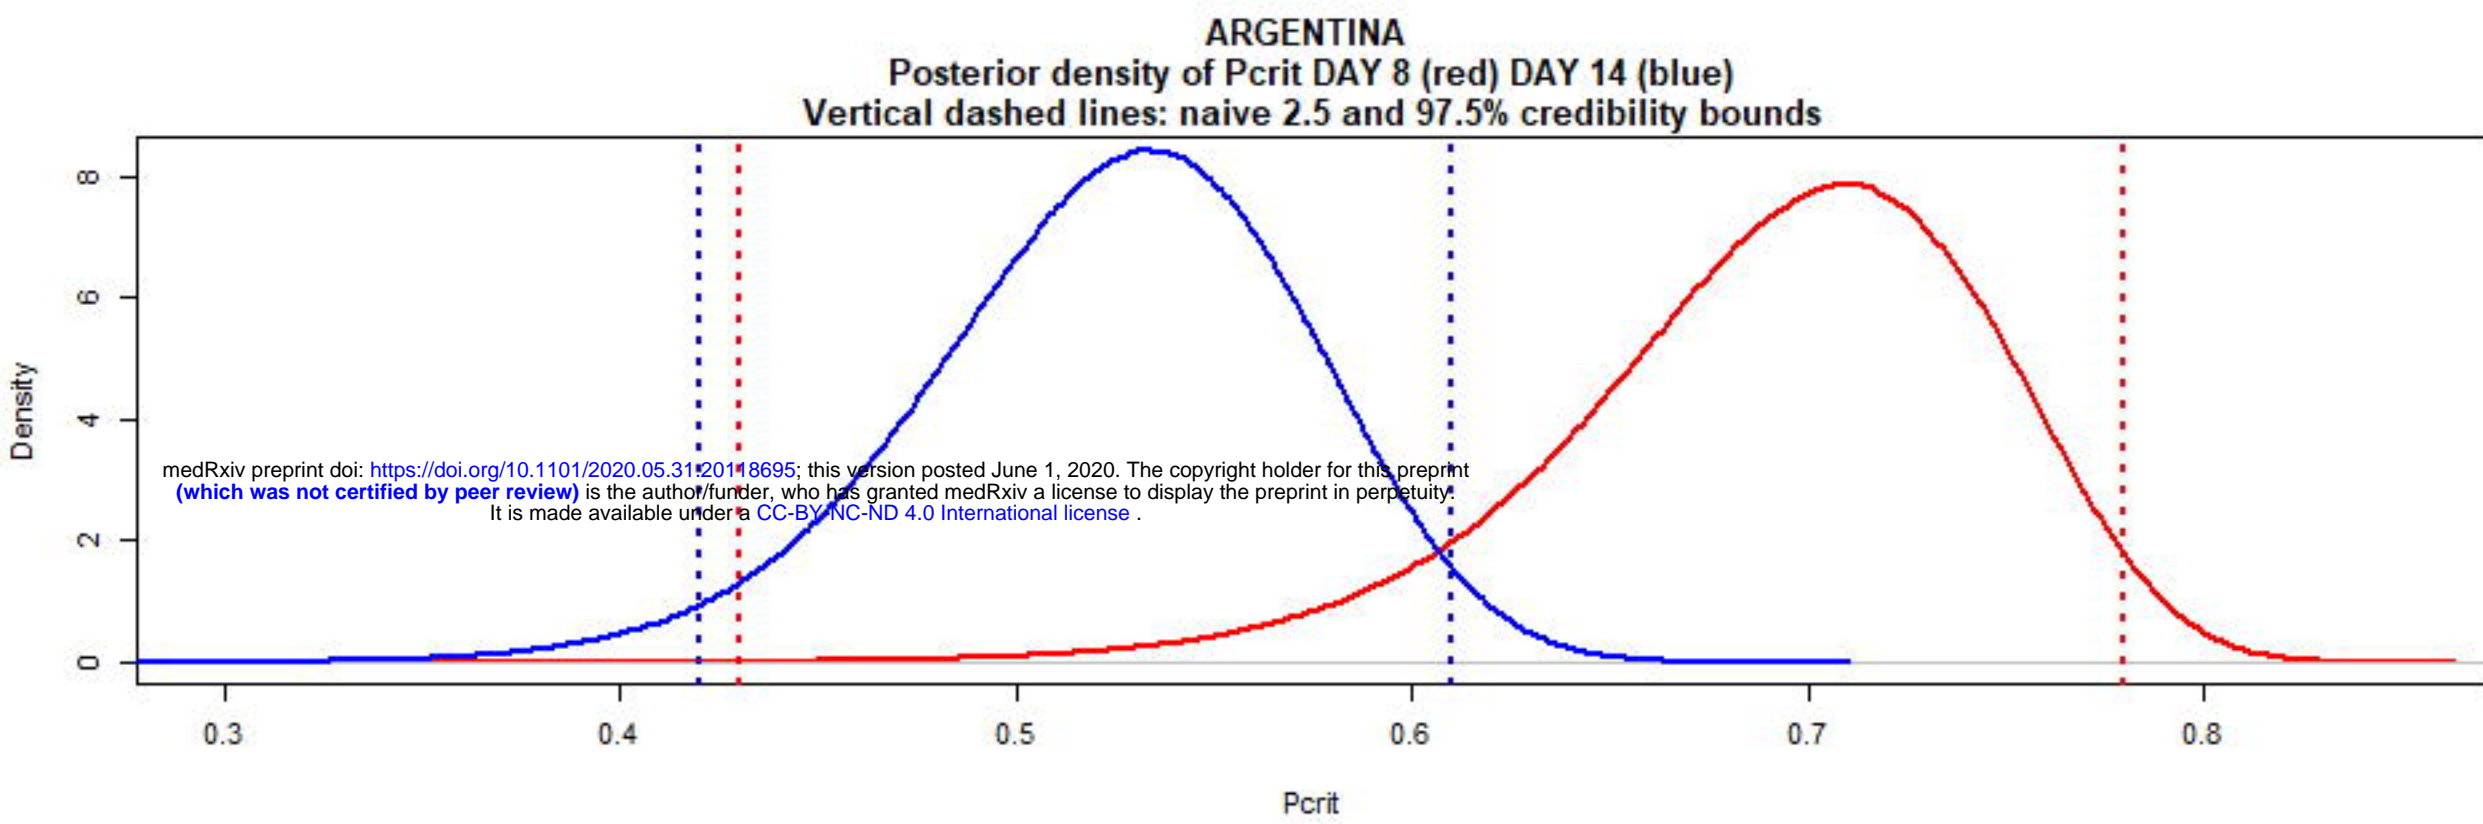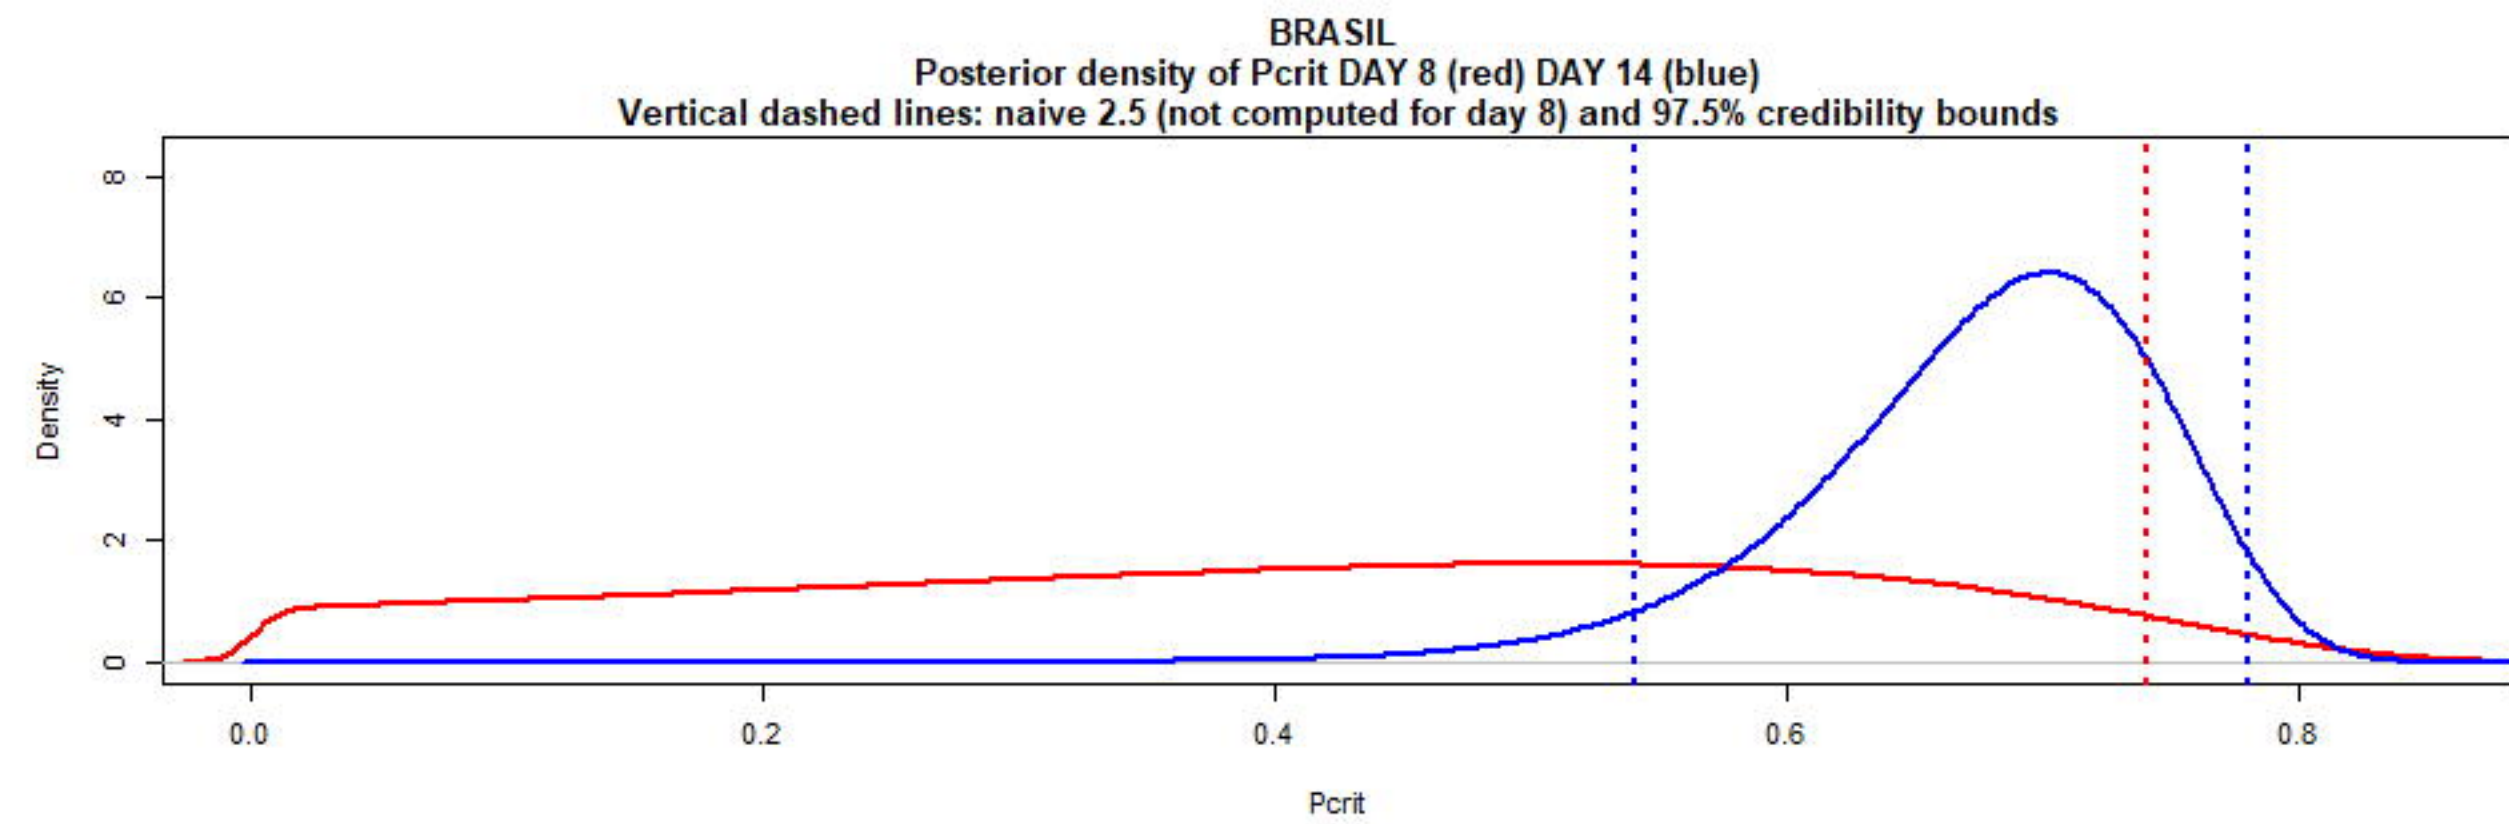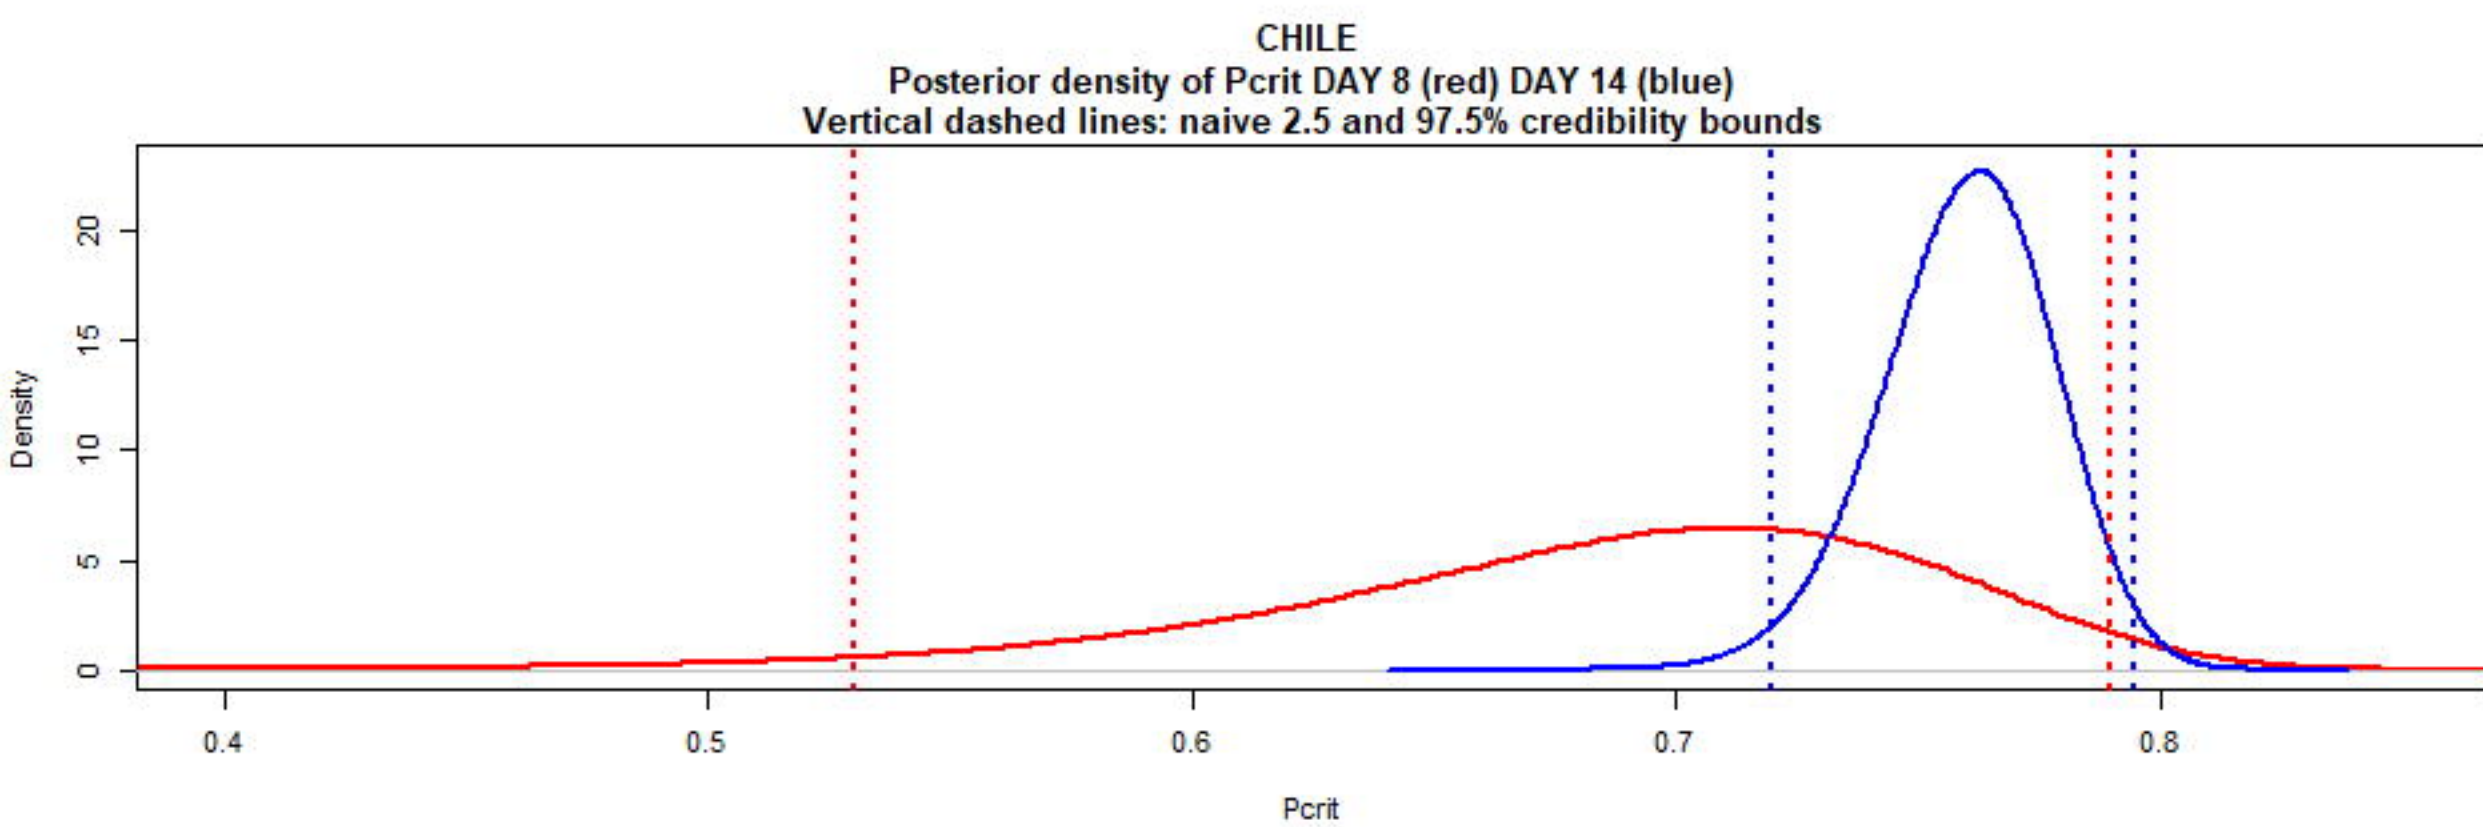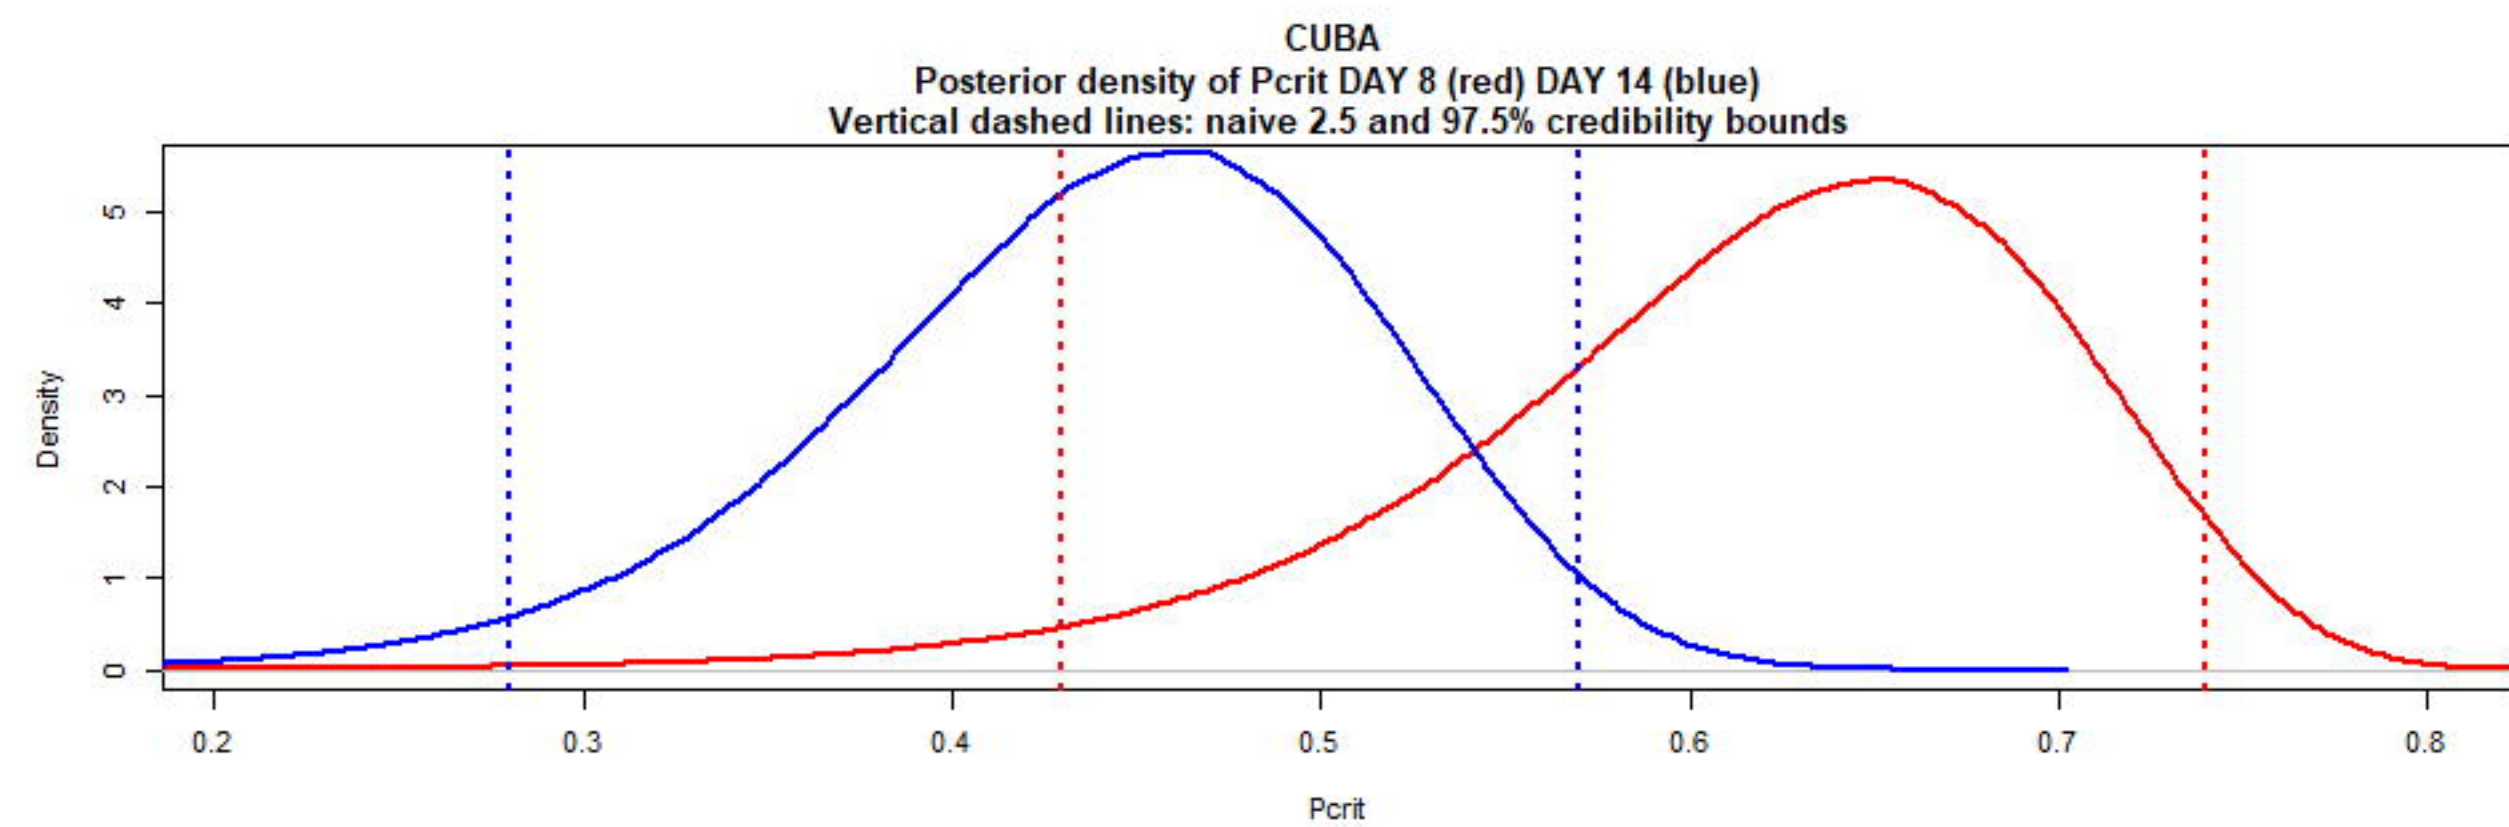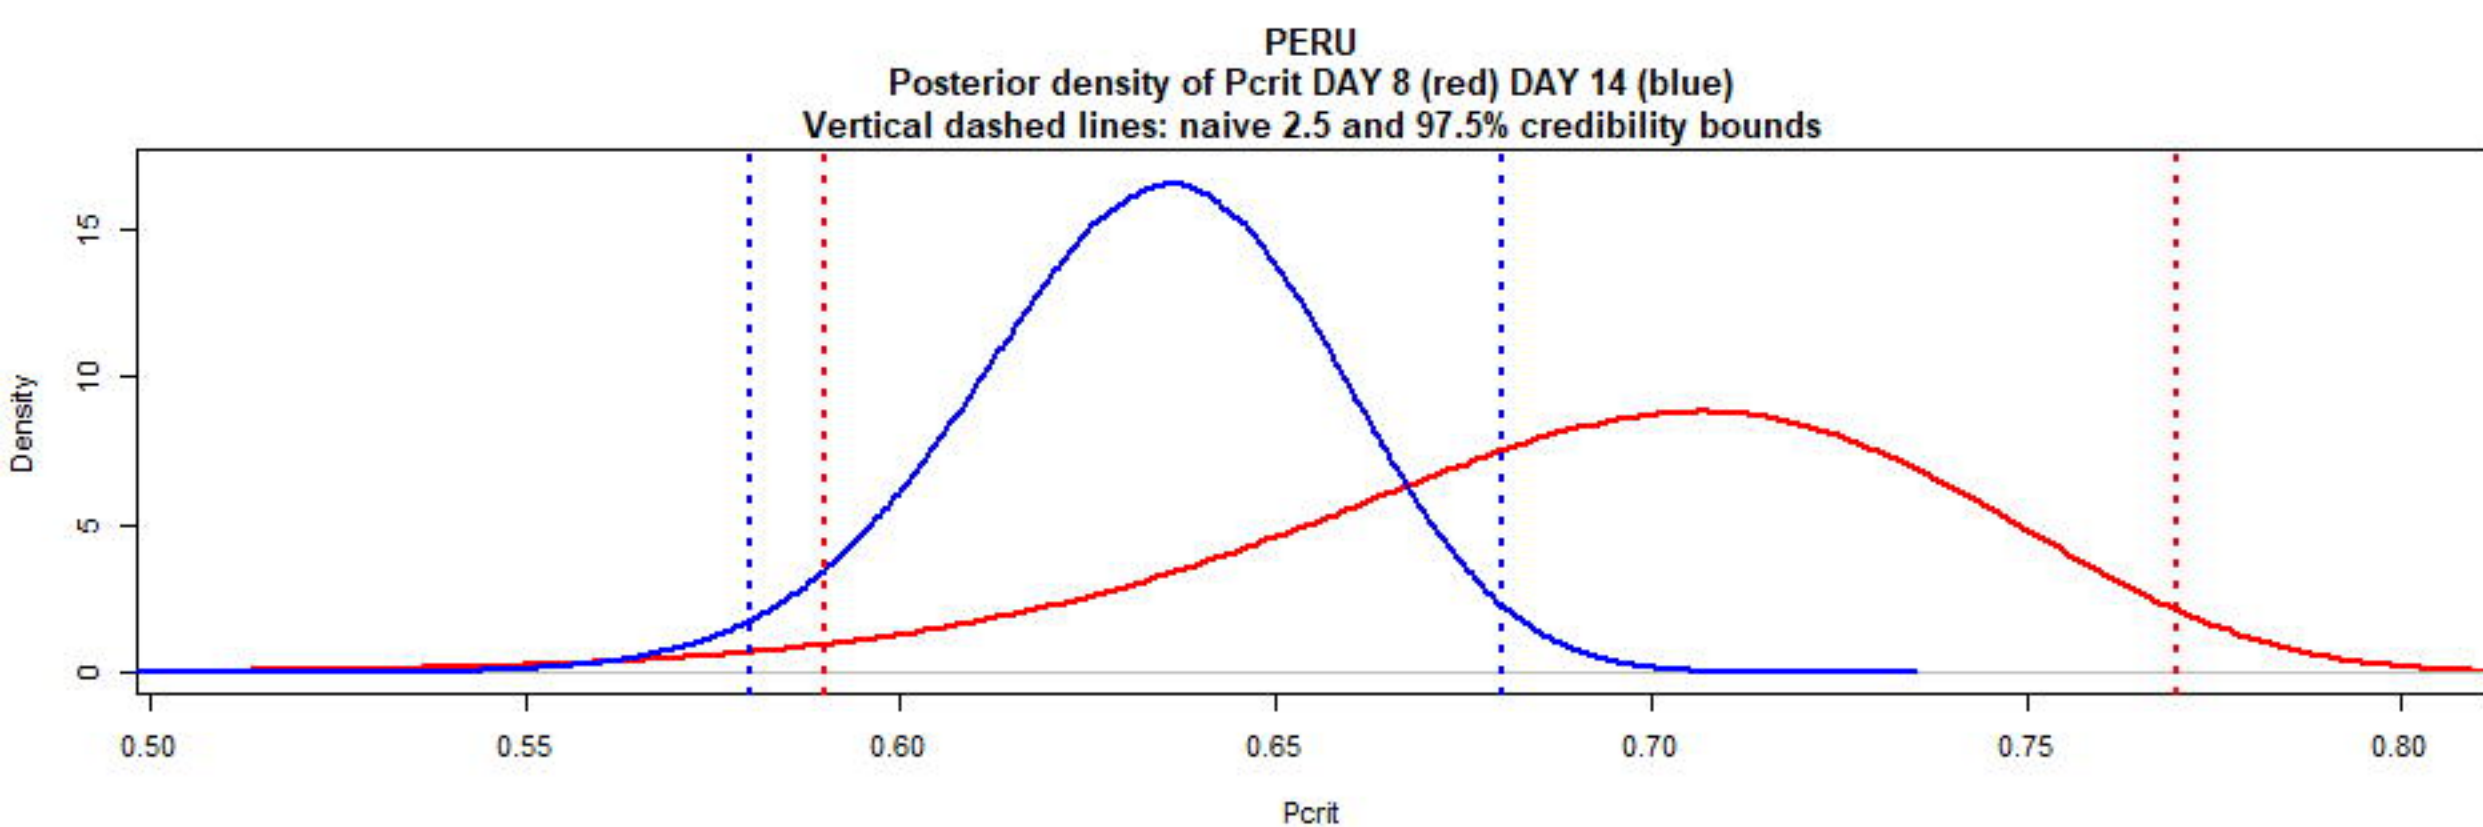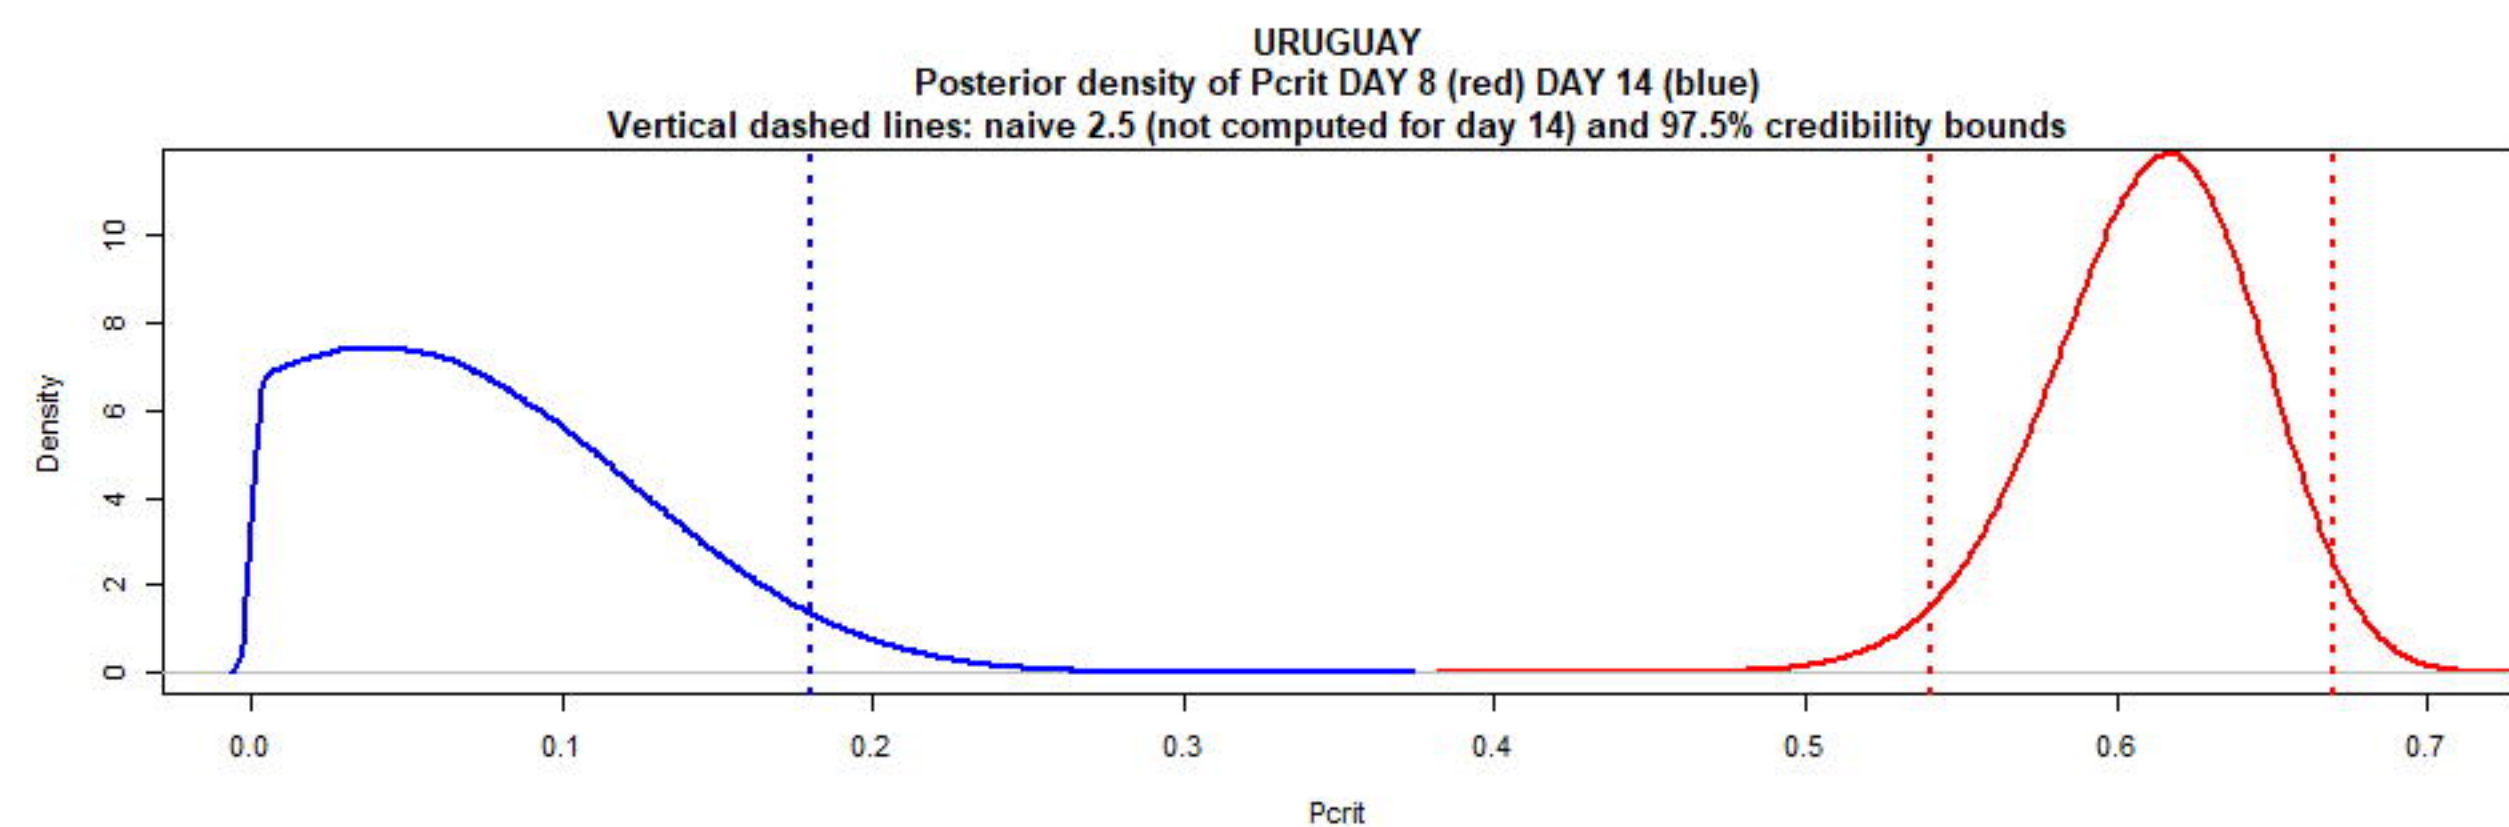



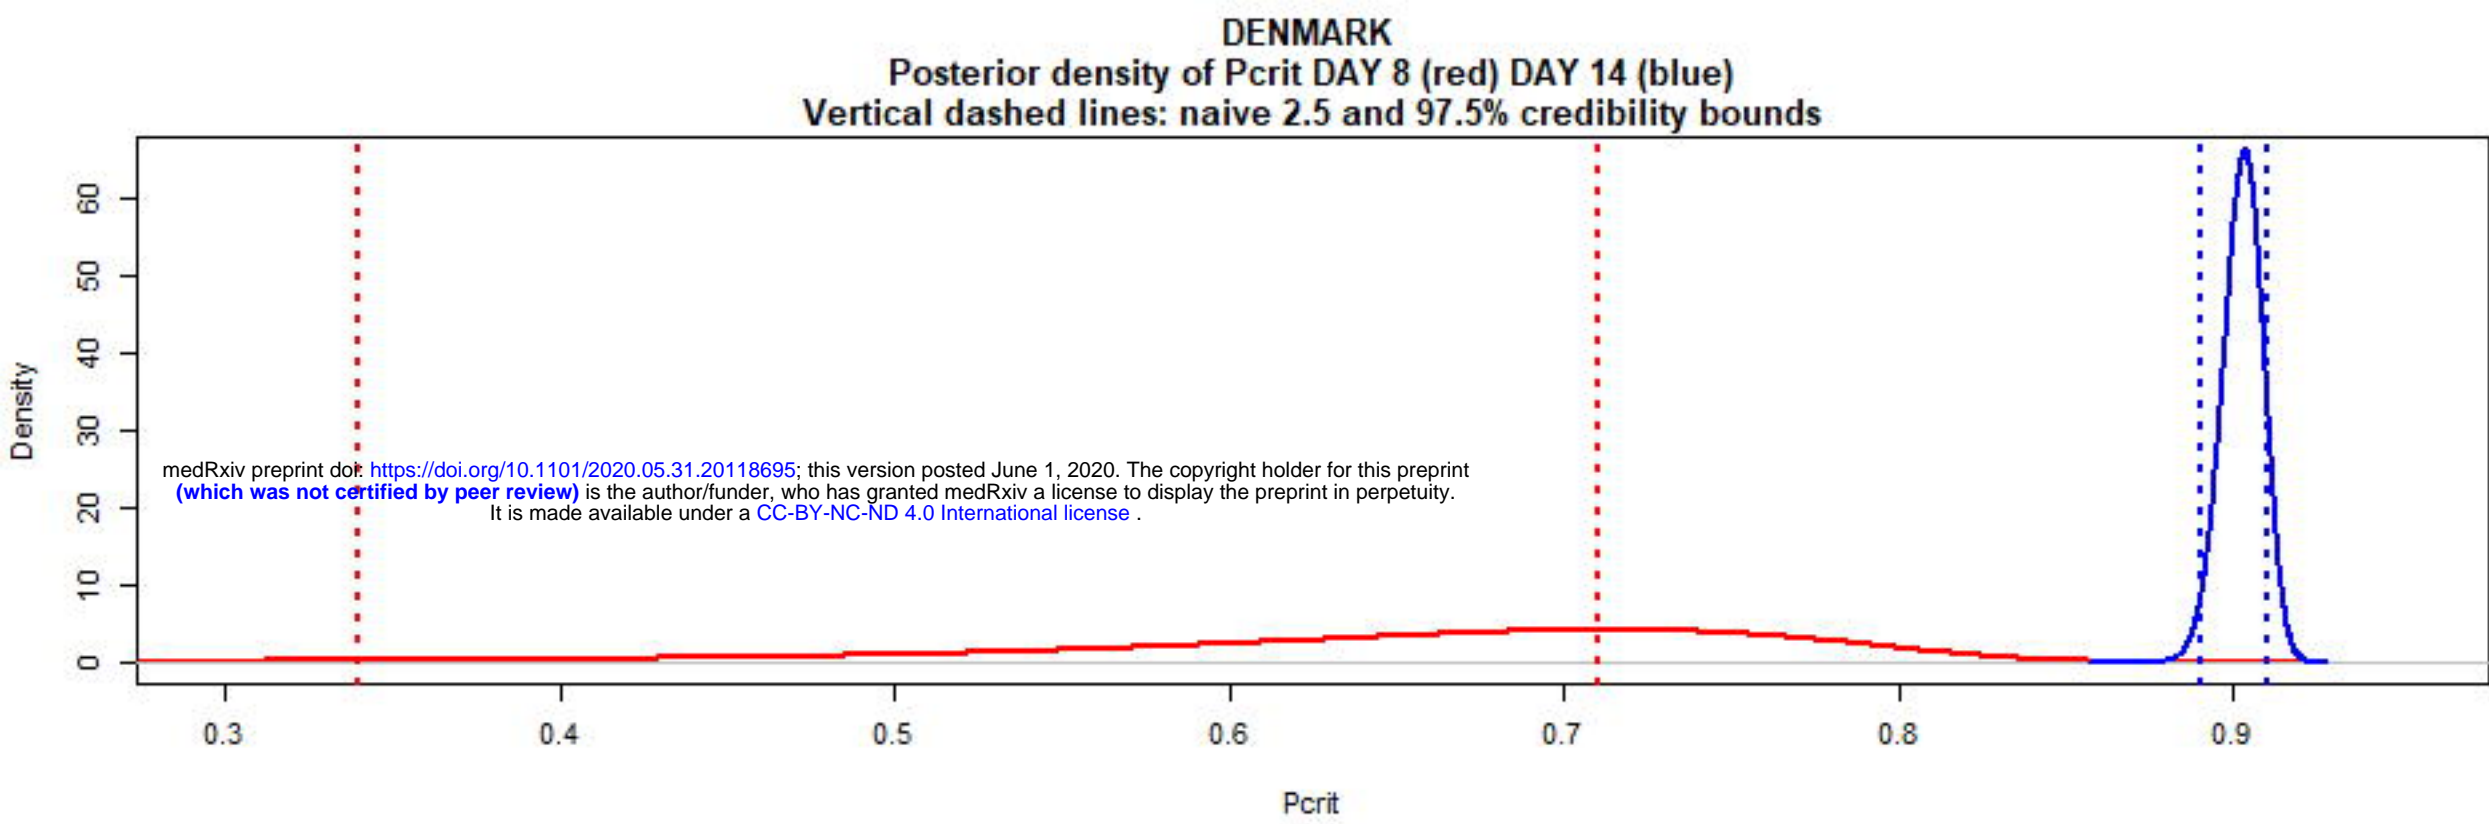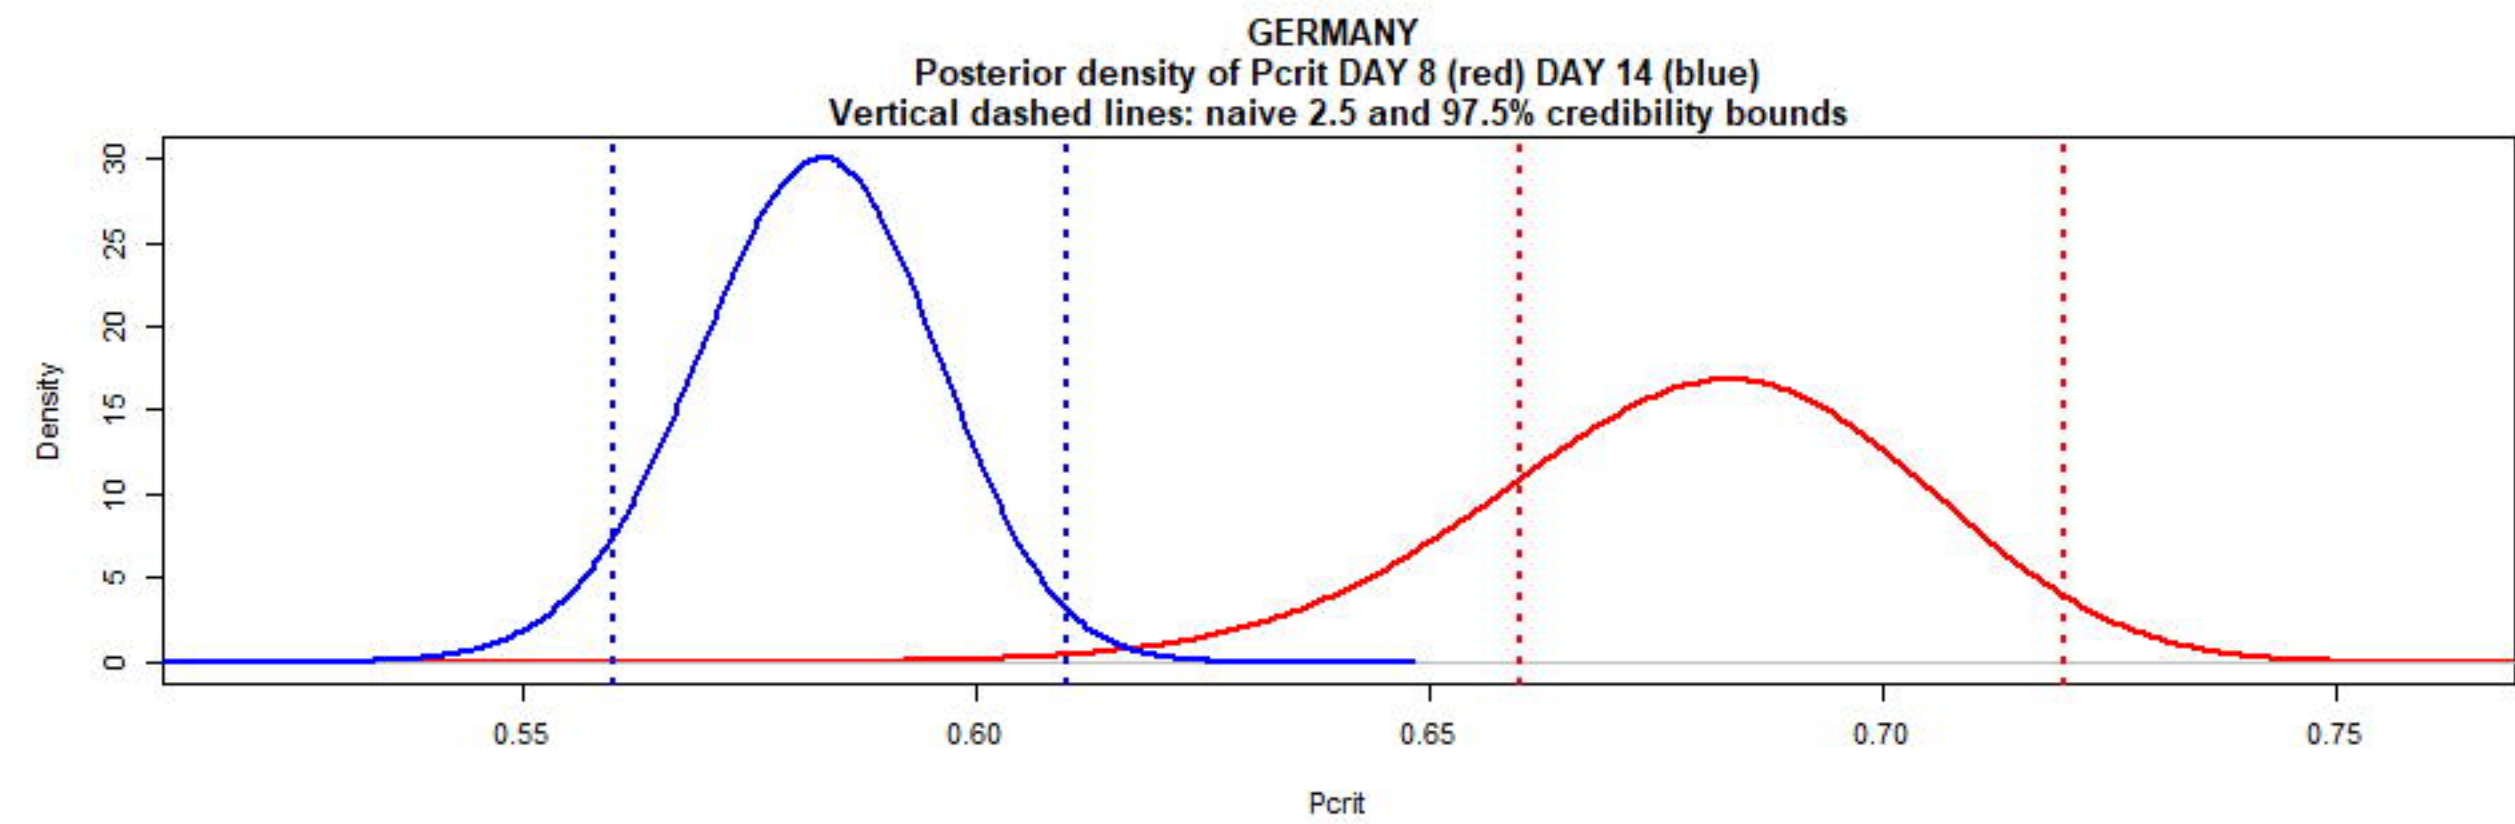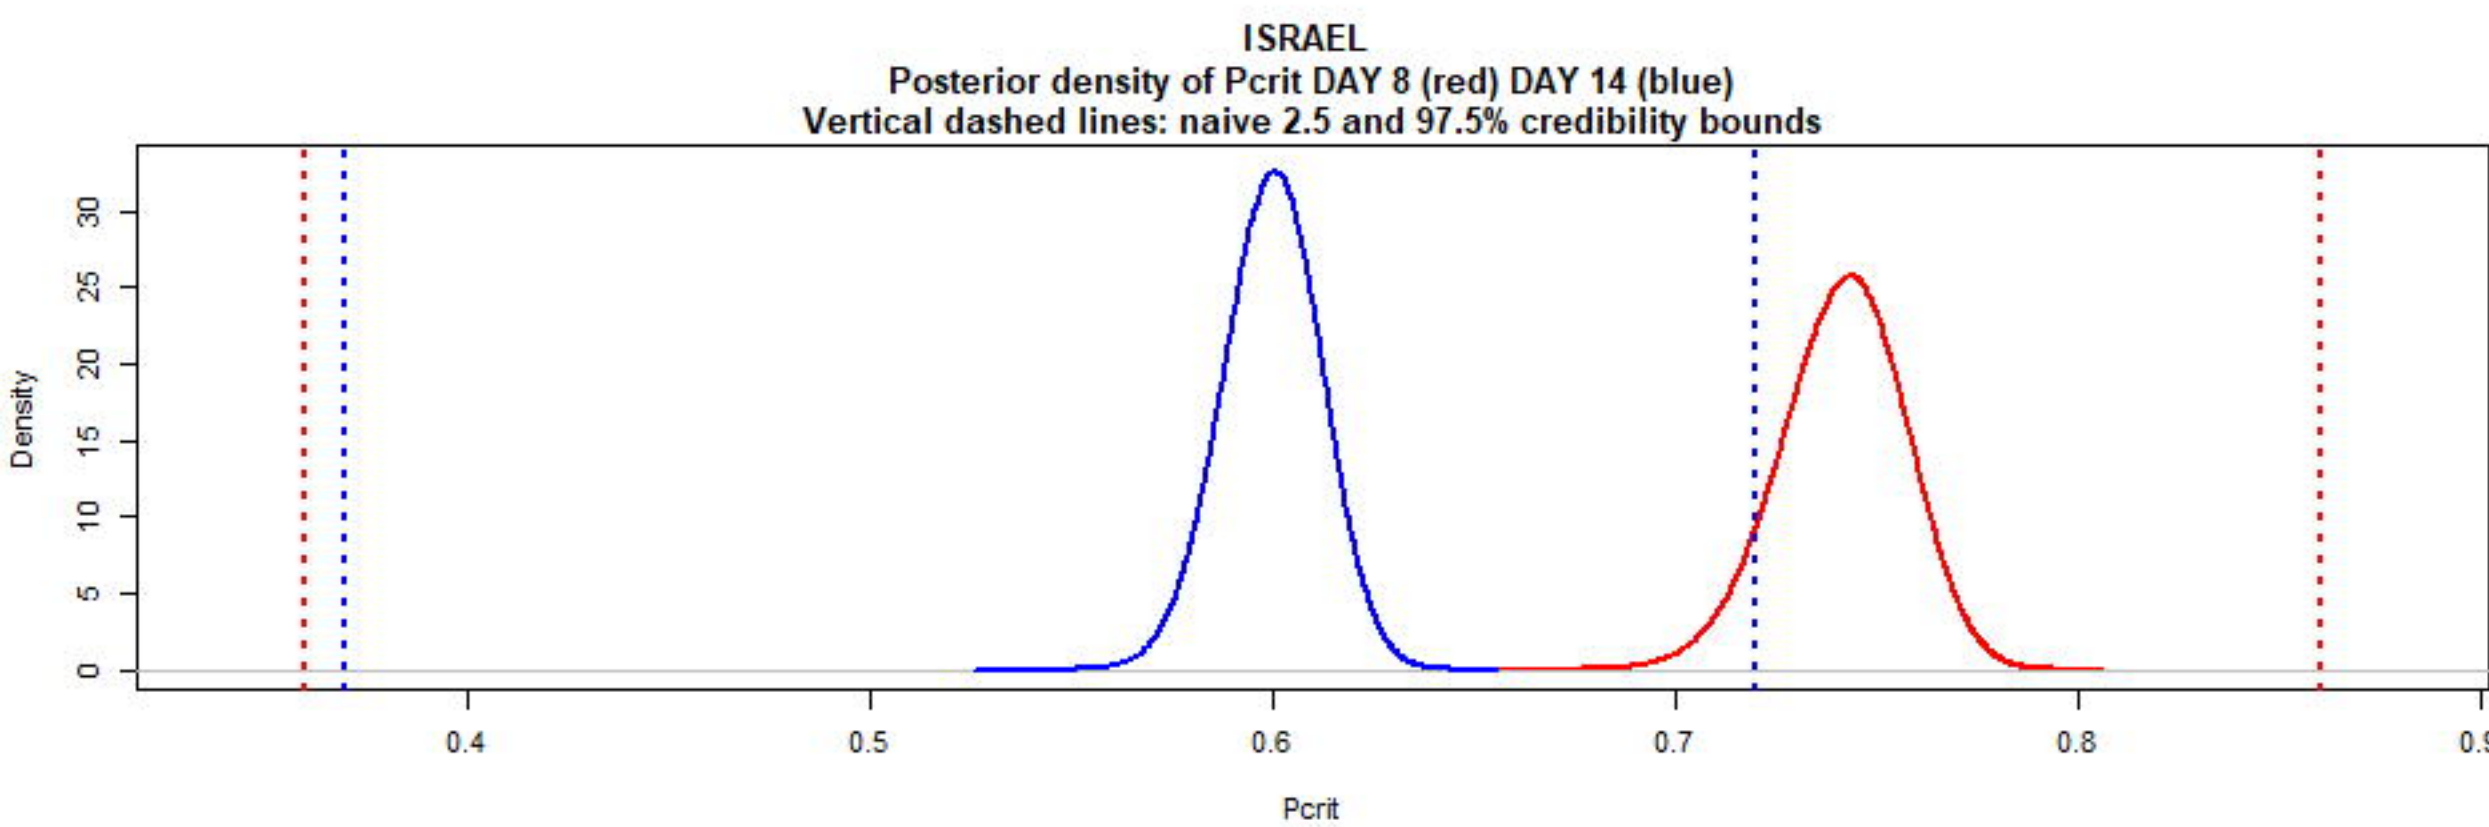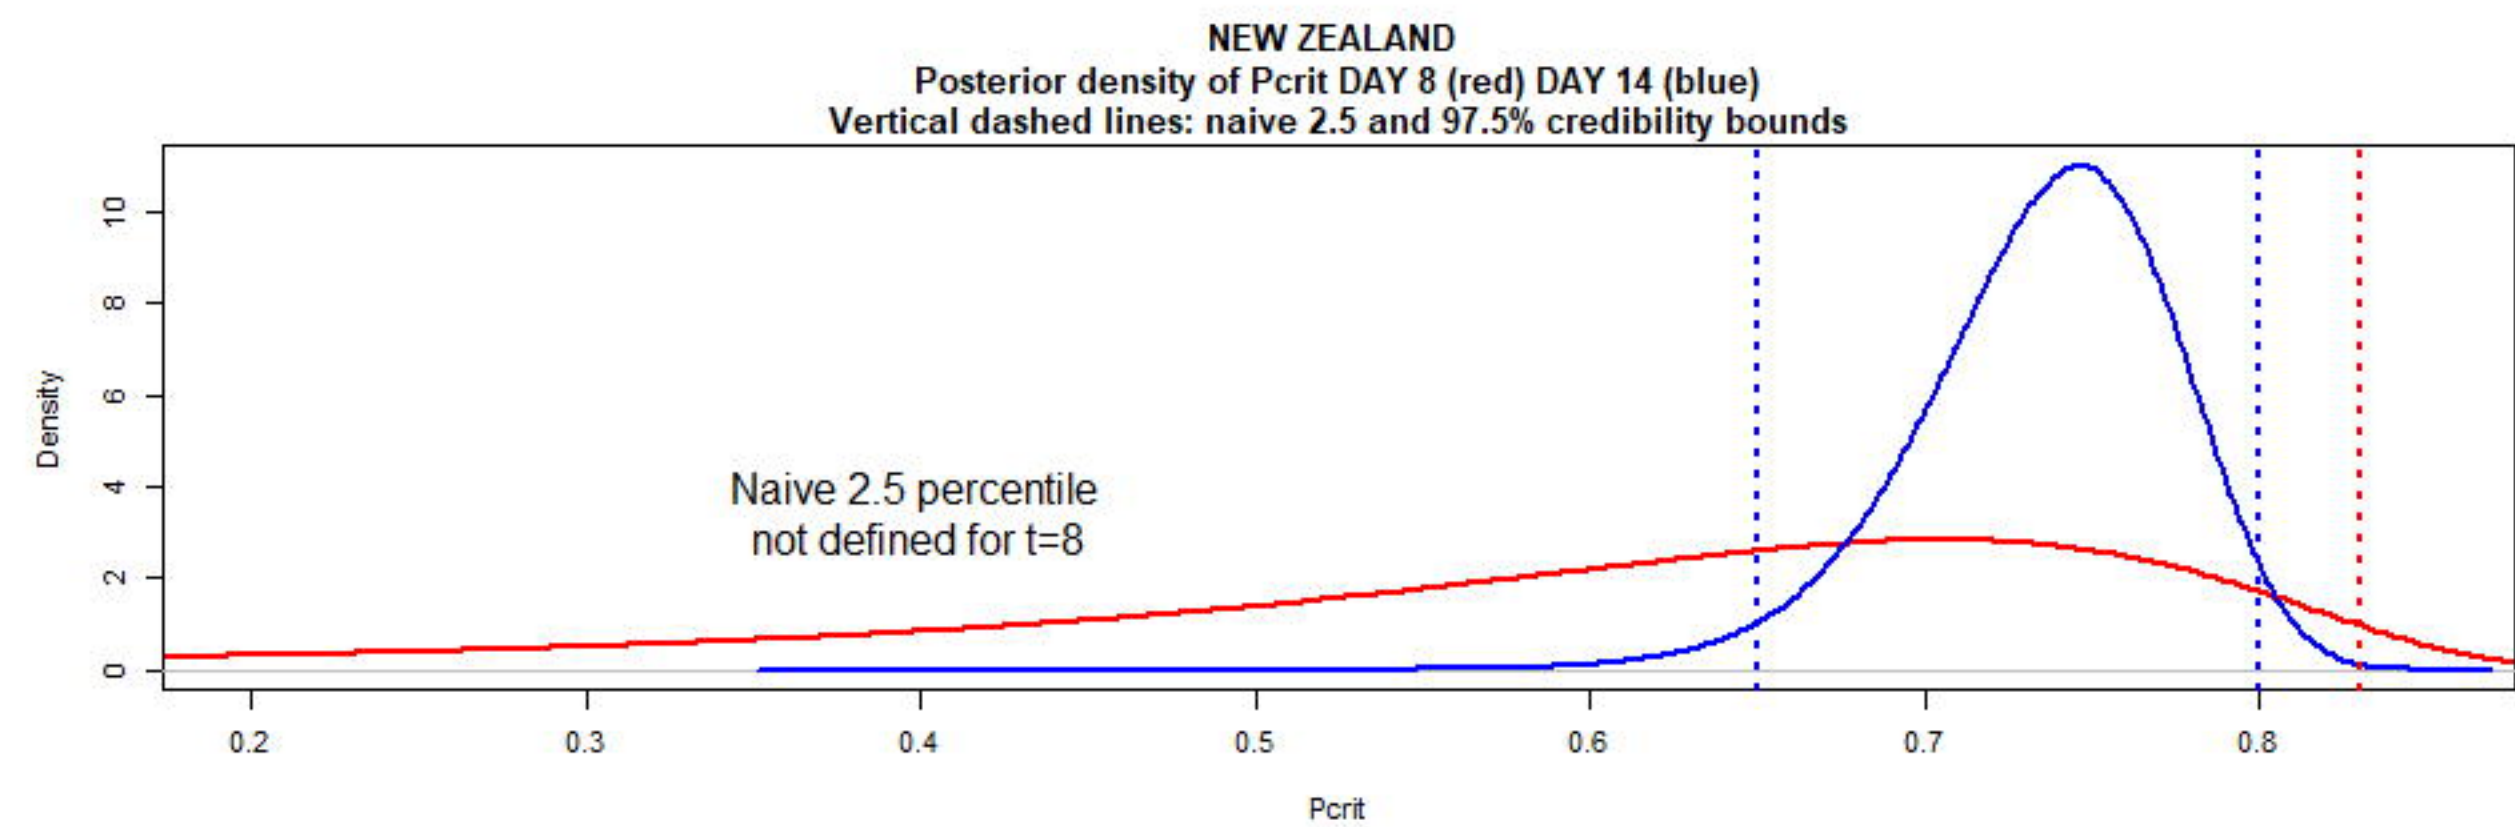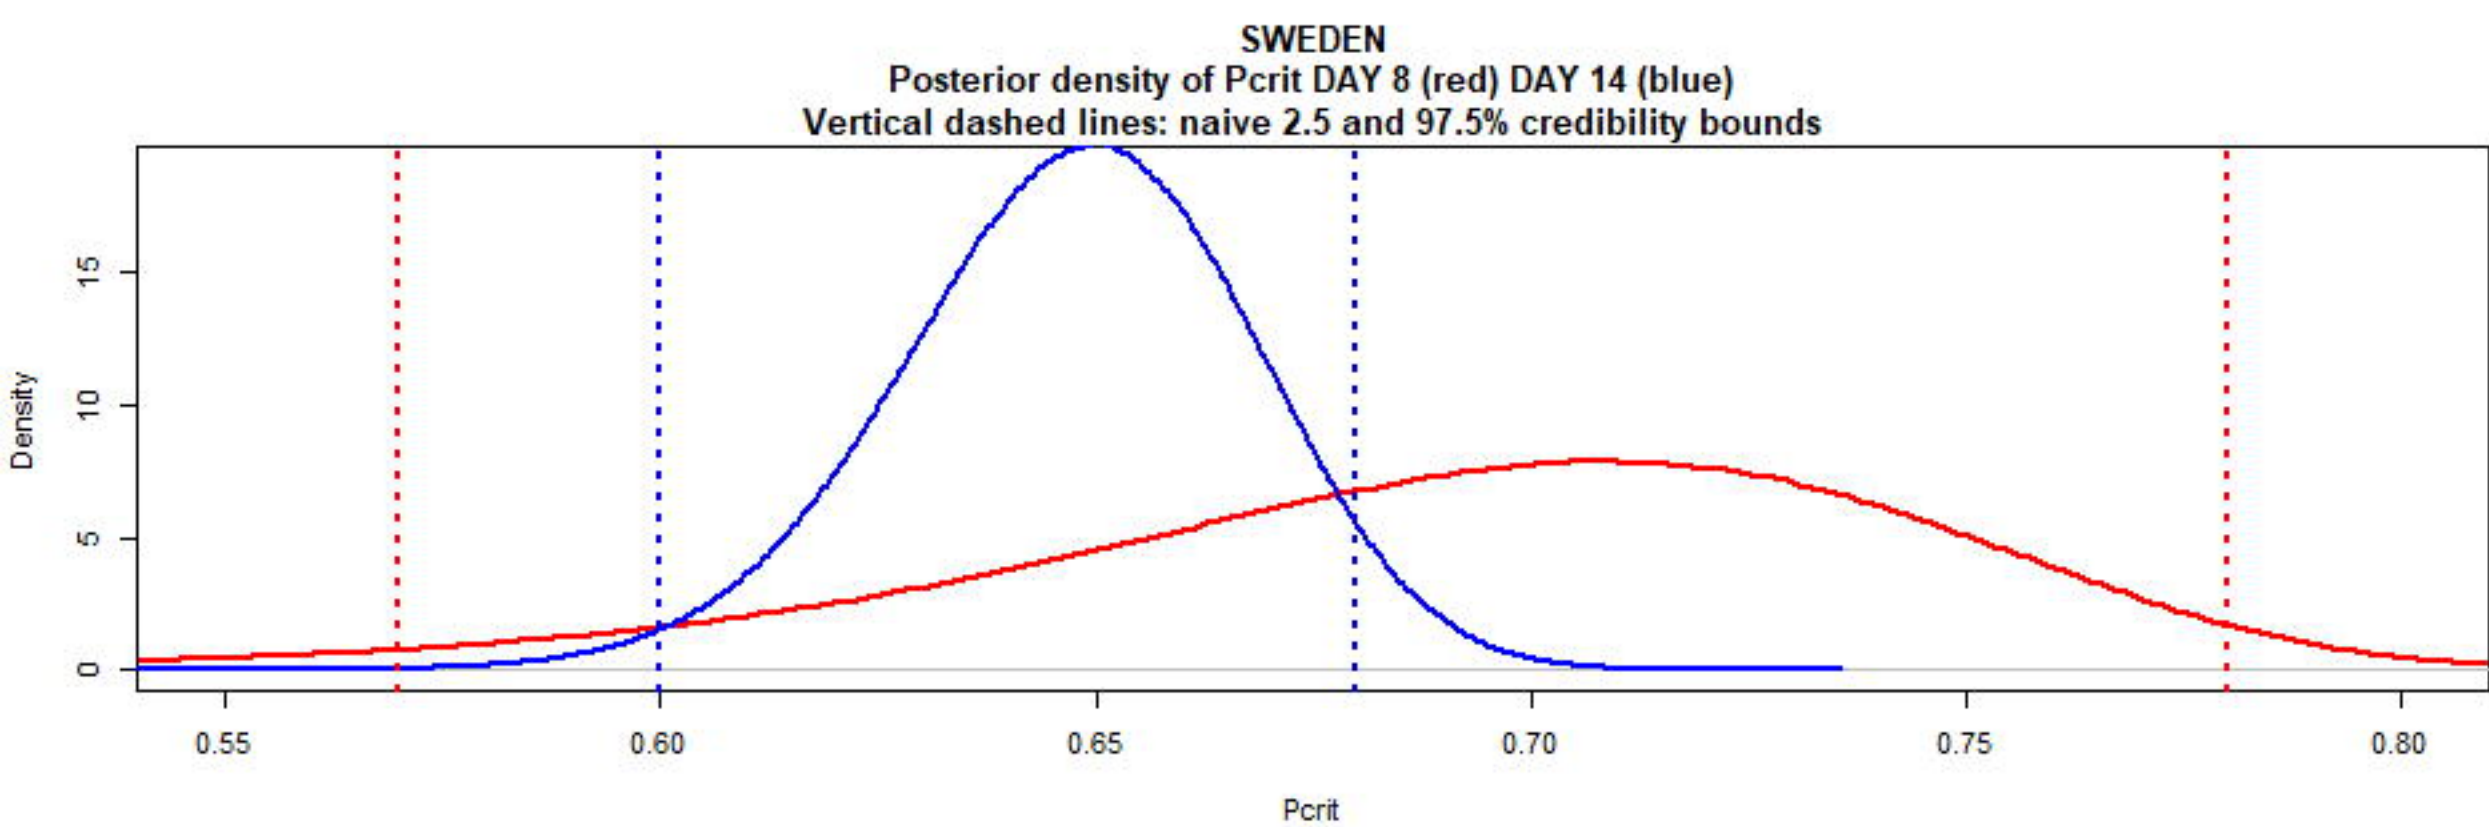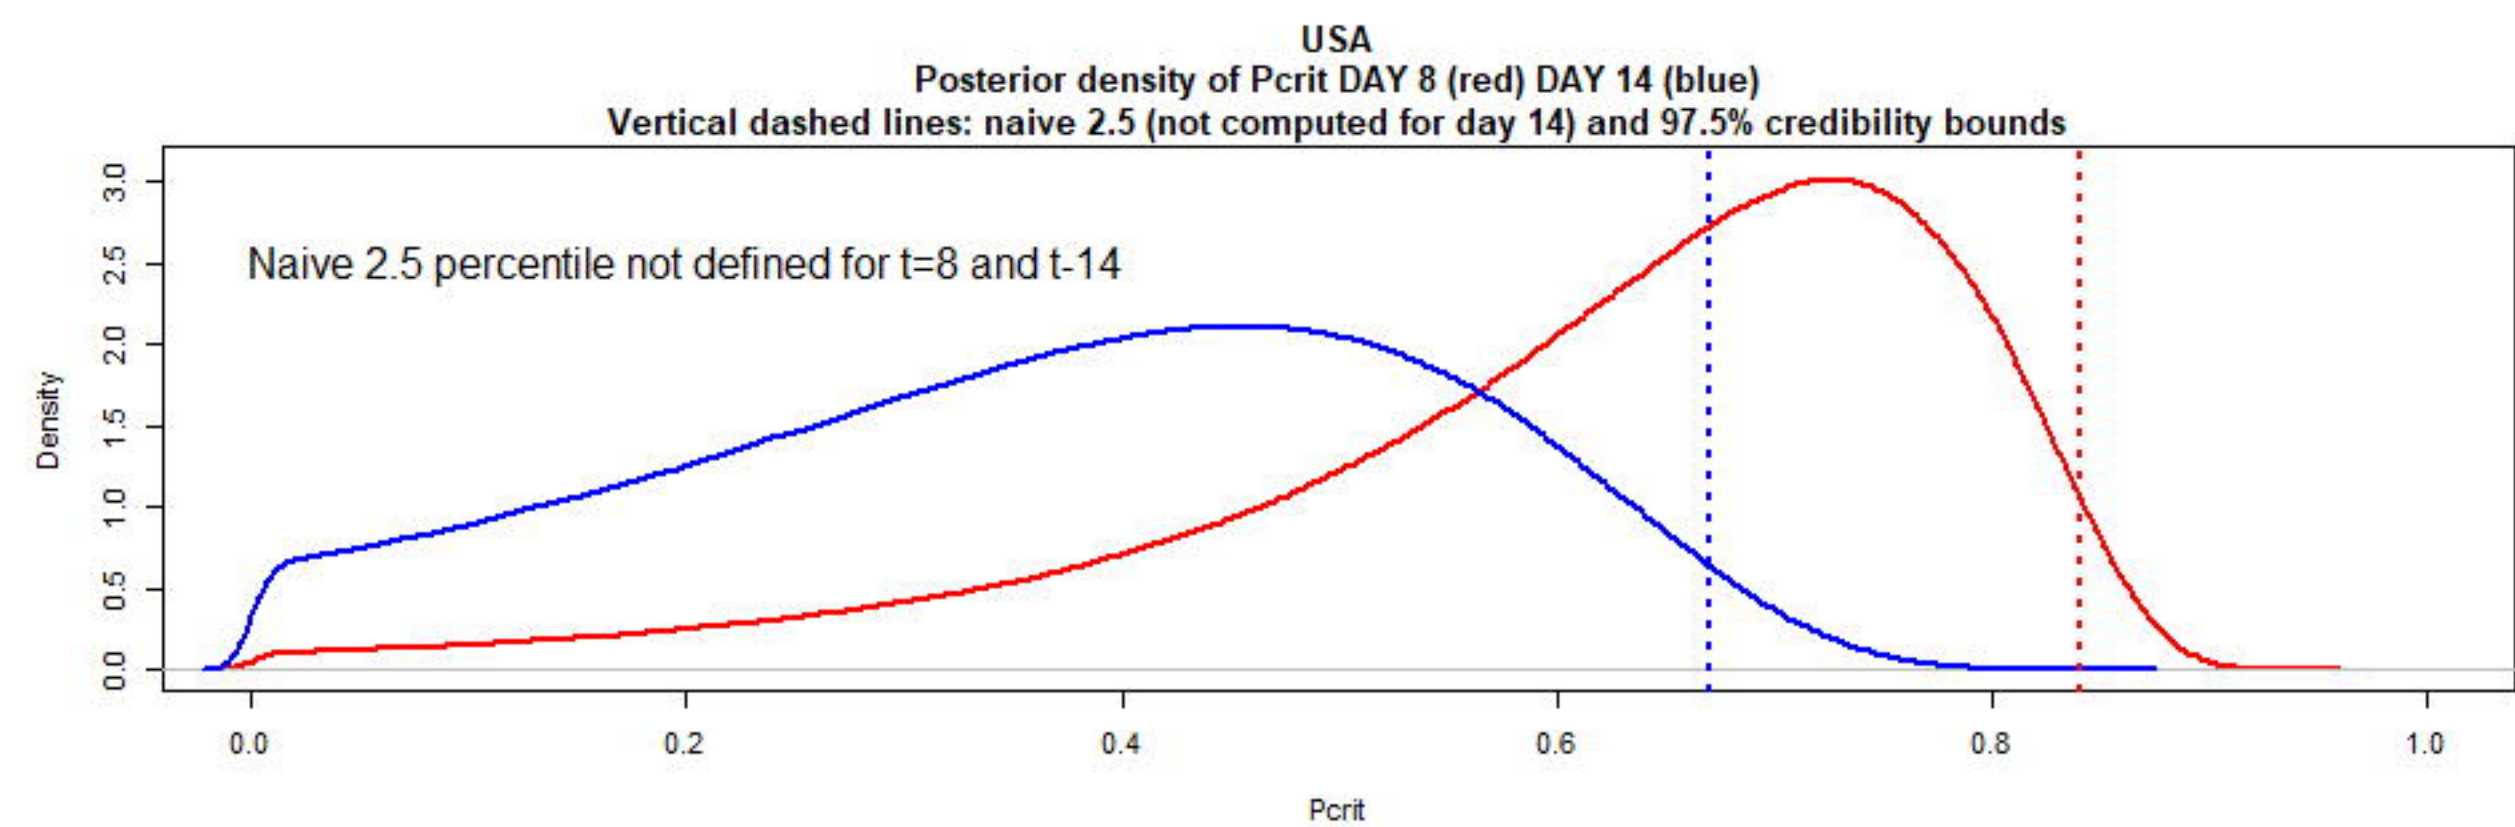

Source: https://medrxiv.org/content/10.1101/2020.05.31.20118695v1.full.pdf
